# Supplementary material
Source: Springer Nature journal article supplement (https://www.springermedizin.de/resource/supplementary/12943_2007_369_MOESM4_ESM.pdf/9554030)

A.

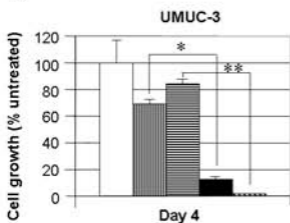

B.

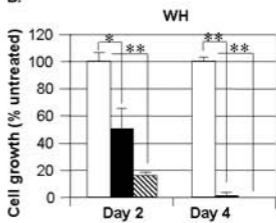

untreated    
  rAd/eGFP 100    
  rAd/eGFP 500  
 rAd/dnStat3 100    
  rAd/dnStat3 500

C.

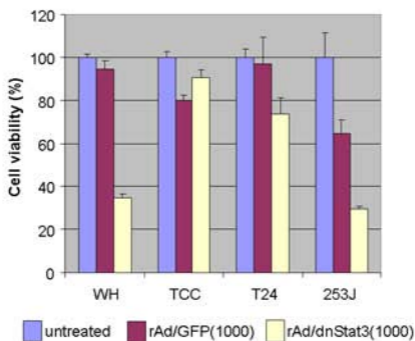

D.

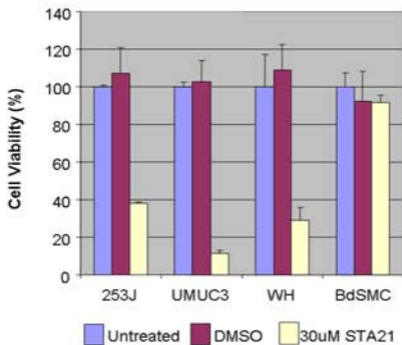

Supplement: MOESM4 [file 9554030]
